# Supplementary material
Source: Springer Nature journal article supplement (https://www.springermedizin.de/resource/supplementary/12882_2009_139_MOESM1_ESM.pdf/9453130)
Supplement: MOESM1 [file 9453130]

**Alberta Kidney Disease Network Database**

**Alberta Kidney Disease Network**  
Laboratory Data  
 Results of laboratory tests (creatinine, hemoglobin, hemoglobin A1c, potassium, lipid profile, urine protein)  
 Unique identifier allowing linkage with other data sources

**Alberta Health and Wellness**  
Alberta Vital Statistics  
 Date of death  
 Cause of death

**Alberta Health and Wellness**  
Population Registry  
 Date of birth, gender, First Nation status, postal code, socioeconomic status by fiscal year

**Alberta Health and Wellness**  
Alberta Blue Cross  
 Formulary drugs, date of dispensing, quantity dispensed  
 Cost

**Alberta Health and Wellness**  
Ambulatory Care  
 Date, nature and location of service  
 Diagnostic and procedure codes (ICD-9-CM and ICD10-CA)  
 Cost

**Alberta Health and Wellness**  
Inpatient Encounters  
 Admission and discharge dates  
 Diagnostic and procedure codes (ICD-9-CM and ICD-10-CA)  
 Case Mix Group  
 Costs

**Alberta Health and Wellness**  
Physician Claims  
 Date and location of service  
 Diagnostic codes (ICD-9-CM)  
 Provider specialty  
 Costs

Alberta Renal Program Database  
 Identification of patients with a kidney transplant, on dialysis therapy, or recipients of multidisciplinary renal care

Chronic Disease Management  
 Identification of patients receiving Chronic Disease Management care

**Alberta Health & Wellness**

**Selected Examples of Data Use**

- Identification of medical risk (lab data, diagnostic codes)
- Identification of non-medical risk (socioeconomic status, First Nations status, geographic location, physician and health care resource & program availability by postal code region)
- Quantification of utilization of appropriate /inappropriate physician, out-patient resources, in-patient encounters, and medications
- Health care costs and resource utilization
- Final health outcomes (death, hospitalization, new diagnosis)
- Intermediate health outcomes (hemoglobin A1c, progression of kidney function, adherence to standards of care)
